# Supplementary material for: OPC-167832, a Novel Carbostyril Derivative with Potent Antituberculosis Activity as a DprE1 Inhibitor
Source: PubMed Central journal article supplement (PMC7269503; doi:10.1128/aac.02020-19), 2020-05-21
Supplement: AAC.02020-19-s0001.pdf [file AAC.02020-19-s0001.pdf]

## Supplemental Material

**TABLE S1**      **Primers Used in This Study**

| Primers                         | Sequence                             |
|---------------------------------|--------------------------------------|
| For cloning of rv0678 and dprE1 |                                      |
| rv0678-F1                       | 5'- TTATCGATGTGAGCGTCAACGACGGGGT -3' |
| rv0678-R1                       | 5'- CCGGATCCTCAGTCGTCCTCTCCGGTTC -3' |
| dprE1-F                         | 5'- ATGTTGAGCGTGGGAGCTACCACTA-3'     |
| dprE1-R                         | 5'- ATGTTGAGCGTGGGAGCTACCACTA-3'     |
| For sequencing of dprE1         |                                      |
| dprE1-F2                        | 5'- CAGCATGGACCTGCTGACCG -3'         |
| dprE1-F3                        | 5'- AACGGGCTGGCCAACAAATA -3'         |
| dprE1-R2                        | 5'- TATTTGTTGGCCAGCCCGTT -3'         |

**TABLE S2 Antimycobacterial Activity of OPC-167832 Against Susceptible and MDR/XDR Strains**

| Group Name  | No. of Strains | MIC ( $\mu\text{g/mL}$ ) |                   |                   |
|-------------|----------------|--------------------------|-------------------|-------------------|
|             |                | Range                    | MIC <sub>50</sub> | MIC <sub>90</sub> |
| Susceptible | 20             | 0.00024 - 0.002          | 0.0005            | 0.001             |
| MDR/XDR     | 20             | 0.00024 - 0.002          | 0.001             | 0.002             |

The MICs of OPC-167832 against 40 strains of clinically isolated MTB, 20 strains of drug-susceptible and 20 strains of drug-resistant (14 MDR-TB and 6 XDR-TB), were determined by an agar proportion method (CLSI document M24-A2). The MIC to inhibit the growth of 50% and 90% of the isolates in each group (MIC<sub>50</sub> and MIC<sub>90</sub>) were also determined.

**TABLE S3 Mutations on *rv0678* and *rv3790* Genes of OPC-167832-Resistant Strains**

| Isolation    |            | MIC<br>( $\mu\text{g/mL}$ ) | <i>rv0678</i><br>(Transcriptional regulator) | <i>rv3790</i><br>(DprE1) |                    |                     |
|--------------|------------|-----------------------------|----------------------------------------------|--------------------------|--------------------|---------------------|
| DMSO         |            | -                           | 0.00024                                      | WT*                      |                    |                     |
|              |            | 1                           | 0.001                                        | 84_85insIS6110**         |                    |                     |
| OPC-167832   |            | 2                           | 0.001                                        | 198_199insG (frameshift) |                    |                     |
| 4 x MIC      |            | 3                           | 0.001                                        | 84_85insIS6110**         |                    |                     |
|              |            | 4                           | 0.001                                        | 84_85insIS6110**         |                    |                     |
| MTB<br>H37Rv |            |                             | 1                                            | 0.008                    | WT                 | 742G→T (Gly248Cys)  |
|              | OPC-167832 |                             | 2                                            | 0.008                    | WT                 | 1091A→G (Asn364Ser) |
|              | 16 x MIC   |                             | 3                                            | 0.004                    | WT                 | 1160G→C (Cys387Ser) |
|              |            |                             | 4                                            | 0.008                    | WT                 | 1091A→G (Asn364Ser) |
|              |            |                             | 5                                            | 0.004                    | WT                 | 1091A→G (Asn364Ser) |
| OPC-167832   |            | 1                           | 0.063                                        | WT                       | 940T→C (Tyr314His) |                     |
| 64 x MIC     |            | 2                           | 0.063                                        | WT                       | 940T→C (Tyr314His) |                     |
|              |            | 3                           | 0.063                                        | WT                       | 940T→C (Tyr314His) |                     |

\*: Corresponding to H37Rv wild type sequence

\*\* : An insertion mutant which an IS6110 IS-like element of MTB H37Rv was inserted (1).

**TABLE S4 Plasma and Lung Pharmacokinetic Parameters of OPC-167832 in Mice**

| Dose<br>(mg/kg) | Plasma          |             |                   |                                      | Lung           |             |                  |                                      |
|-----------------|-----------------|-------------|-------------------|--------------------------------------|----------------|-------------|------------------|--------------------------------------|
|                 | Cmax<br>(ng/mL) | tmax<br>(h) | AUCt<br>(ng*h/mL) | t <sub>1/2</sub> <sup>a</sup><br>(h) | Cmax<br>(ng/g) | tmax<br>(h) | AUCt<br>(ng*h/g) | t <sub>1/2</sub> <sup>a</sup><br>(h) |
| 0.625           | 912             | 1.0         | 283 (t: 8h)       | 1.6 (2 - 8h)                         | 162            | 1.0         | 505 (t: 8h)      | 1.4 (2 - 8h)                         |
| 1.25            | 200             | 1.0         | 543 (t: 12h)      | 1.5 (2 - 12h)                        | 303            | 1.0         | 909 (t: 8h)      | 2.0 (4 - 8h)                         |
| 2.5             | 314             | 0.5         | 1141 (t: 12h)     | 1.3 (6 - 12h)                        | 651            | 0.5         | 2133 (t: 8h)     | 1.3 (2 - 8h)                         |
| 5               | 758             | 1.0         | 2649 (t: 12h)     | 2.1 (2 - 12h)                        | 1364           | 1.0         | 4742 (t: 12h)    | 2.1 (2 - 12h)                        |
| 10              | 1094            | 1.0         | 3785 (t: 12h)     | 1.6 (2 - 12h)                        | 2223           | 1.0         | 7410 (t: 12h)    | 2.1 (6 - 12h)                        |

<sup>a</sup>t<sub>1/2</sub> in plasma and lung were calculated using the data at the time points indicated in parentheses.

**TABLE S5 Calculation of Log<sub>10</sub> CFU/lung in the study of bactericidal and sterilizing activities of regimens containing delamanid and OPC-167832.**

This table contains data from individual mouse treated 8 weeks or longer and had contaminated plates. For these mice, lung homogenates were plated on 7 or 10 agar plates. But since one or more plates were contaminated, it prevented a direct summation of the total CFU counts. If contamination that prevented colony counting was detected in one or more of the plates while the rest contained countable colonies, the contaminated plate was excluded from the calculation. In this situation, CFUs were summed from countable plates, then divided by the total volume spread on these countable plates to obtain CFU/mL, which was then timed with the total initial plated volume and the dilution factor to obtain the CFU/lung for each mouse. In these mice, if all plates had no CFU, they were considered culture negative (CFU = 0). However, if contamination was detected in one or more of the plates while the rest of the plates had no MTB colonies, one colony was assigned as the total CFU count of uncontaminated plates. The CFU/lung was then calculated as follows: 1 CFU divided by the total volume of lung homogenates plated on the uncontaminated plates, which was then timed with the total volume of the original lung homogenates. This value was considered as the detection limit of our CFU counting methodology, as described in the Method section. Values obtained using this detection limit methodology have a prefix of <. The mean and SD data obtained in this table are shown in Table 3.

| Animal ID      | (A)<br>Total volume of lung homogenate (mL) | Number of 7H11 plates | Number of contaminated plates | (B)<br>Sum of lung homogenate spread on uncontaminated plates (mL) | (C)<br>Number of detected colony | CFU/mL (C)÷(B)      | CFU/lung (C)÷(B)×(A) | Log <sub>10</sub> CFU/lung |
|----------------|---------------------------------------------|-----------------------|-------------------------------|--------------------------------------------------------------------|----------------------------------|---------------------|----------------------|----------------------------|
| Group: DCM-10w |                                             | Mean: 0.077, SD 0.130 |                               |                                                                    |                                  |                     |                      |                            |
| 1              | 2.18                                        | 7                     | 1                             | 1.80                                                               | 0                                | <0.556 <sup>a</sup> | <1.211 <sup>a</sup>  | <0.083 <sup>a</sup>        |
| 2              | 2.22                                        | 7                     | 0                             | 2.22                                                               | 0                                | 0.000               | 0.000                | 0.000                      |
| 3              | 2.18                                        | 7                     | 0                             | 2.18                                                               | 1                                | 0.4587              | 1.000                | 0.000                      |
| 4              | 2.20                                        | 7                     | 0                             | 2.20                                                               | 1                                | 0.4545              | 1.000                | 0.000                      |
| 5              | 2.20                                        | 7                     | 0                             | 2.20                                                               | 2                                | 0.9091              | 2.000                | 0.301                      |

| Group: DCLzM-8w  |      | Mean 0.328, SD 0.452 |   |      |    |                     |                     |                     |
|------------------|------|----------------------|---|------|----|---------------------|---------------------|---------------------|
| 1                | 2.21 | 10                   | 0 | 2.21 | 0  | 1.810               | 4.000               | 0.602               |
| 2                | 2.21 | 10                   | 1 | 2.01 | 9  | 4.478               | 9.896               | 0.995               |
| 3                | 2.25 | 10                   | 0 | 2.25 | 1  | 0.4444              | 1.000               | 0.000               |
| 4                | 2.21 | 10                   | 0 | 2.21 | 0  | 0.000               | 0.000               | 0.000               |
| 5                | 2.21 | 10                   | 1 | 2.01 | 0  | <0.498 <sup>a</sup> | <1.100 <sup>a</sup> | <0.041 <sup>a</sup> |
| Group: DCLzM-12w |      | Mean 0.012, SD 0.027 |   |      |    |                     |                     |                     |
| 1                | 2.25 | 7                    | 0 | 2.25 | 0  | 0.000               | 0.000               | 0.000               |
| 2                | 2.22 | 7                    | 0 | 2.22 | 0  | 0.000               | 0.000               | 0.000               |
| 3                | 2.20 | 7                    | 0 | 2.20 | 0  | 0.000               | 0.000               | 0.000               |
| 4                | 2.26 | 7                    | 0 | 2.26 | 0  | 0.000               | 0.000               | 0.000               |
| 5                | 2.28 | 7                    | 1 | 1.98 | 0  | <0.505 <sup>a</sup> | <1.152 <sup>a</sup> | <0.061 <sup>a</sup> |
| Group: DCLzB-8w  |      | Mean 0.354, SD 0.415 |   |      |    |                     |                     |                     |
| 1                | 2.24 | 10                   | 1 | 2.04 | 3  | 1.471               | 3.294               | 0.518               |
| 2                | 2.22 | 10                   | 1 | 2.02 | 0  | <0.495 <sup>a</sup> | <1.099 <sup>a</sup> | <0.041 <sup>a</sup> |
| 3                | 2.27 | 10                   | 3 | 1.40 | 0  | <0.714 <sup>a</sup> | <1.621 <sup>a</sup> | <0.210 <sup>a</sup> |
| 4                | 2.25 | 10                   | 0 | 2.25 | 0  | 0.000               | 0.000               | 0.000               |
| 5                | 2.20 | 10                   | 0 | 2.20 | 10 | 4.545               | 10.00               | 1.000               |
| Group: DCMB-8w   |      | Mean 0.016, SD 0.022 |   |      |    |                     |                     |                     |
| 1                | 2.26 | 10                   | 1 | 2.06 | 0  | <0.485 <sup>a</sup> | <1.097 <sup>a</sup> | <0.040 <sup>a</sup> |
| 2                | 2.23 | 10                   | 0 | 2.23 | 0  | 0.000               | 0.000               | 0.000               |
| 3                | 2.25 | 10                   | 0 | 2.25 | 0  | 0.000               | 0.000               | 0.000               |
| 4                | 2.27 | 10                   | 0 | 2.27 | 0  | 0.000               | 0.000               | 0.000               |
| 5                | 2.23 | 10                   | 1 | 2.03 | 0  | <0.493 <sup>a</sup> | <1.099 <sup>a</sup> | <0.041 <sup>a</sup> |

<sup>a</sup>In mice with contamination detected in one or more of the plates while the rest of the plates had no MTB colonies, one colony was assigned as the total CFU count of uncontaminated plates to calculate CFU/lung.

**TABLE S6 Calculation of Log<sub>10</sub> CFU/lung in the relapse-preventing study.**

This table contains data from individual mouse with contaminated plates that prevented a direct summation of the total CFU counts. If contamination was detected in one or more of the plates while the rest contained countable colonies, the contaminated plate was excluded from the calculation. In this situation, CFUs were summed from countable plates, then divided by the total volume spread on these countable plates to obtain CFU/mL, which was then timed with the total initial plated volume and the dilution factor to obtain the CFU/lung for each mouse. In these mice, if all plates had no CFU, they were considered culture negative (CFU = 0). However, if contamination was detected in one or more of the plates while the rest of the plates had no MTB colonies, one colony was assigned as the total CFU count of uncontaminated plates. The CFU/lung was then calculated as follows: 1 CFU divided by the total volume of lung homogenates plated on the uncontaminated plates, which was then timed with the total volume of the original lung homogenates. This value was considered as the detection limit of our CFU counting methodology, as described in the Method section. Values obtained using this detection limit methodology have a prefix of <. The mean and SD data obtained in this table are shown in Table 4.

| Animal ID                               | (A)<br>Total volume of lung homogenate (mL) | Number of 7H11 plates | Number of contaminated plates | (B)<br>Sum of lung homogenate spread on uncontaminated plates (mL) | (C)<br>Number of detected colony | CFU/mL (C)÷(B)      | CFU/lung (C)÷(B)×(A) | Log <sub>10</sub> CFU/lung |
|-----------------------------------------|---------------------------------------------|-----------------------|-------------------------------|--------------------------------------------------------------------|----------------------------------|---------------------|----------------------|----------------------------|
| Group: RHZE/RH-12w Mean 0.134, SD 0.084 |                                             |                       |                               |                                                                    |                                  |                     |                      |                            |
| 1                                       | 2.24                                        | 7                     | 2                             | 1.64                                                               | 0                                | <0.610 <sup>a</sup> | <1.366 <sup>a</sup>  | <0.135 <sup>a</sup>        |
| 2                                       | 2.21                                        | 7                     | 3                             | 1.31                                                               | 0                                | <0.763 <sup>a</sup> | <1.687 <sup>a</sup>  | <0.227 <sup>a</sup>        |
| 3                                       | 2.23                                        | 7                     | 2                             | 1.50                                                               | 0                                | <0.667 <sup>a</sup> | <1.487 <sup>a</sup>  | <0.172 <sup>a</sup>        |
| 4                                       | 2.23                                        | 7                     | 2                             | 1.63                                                               | 0                                | <0.613 <sup>a</sup> | <1.368 <sup>a</sup>  | <0.136 <sup>a</sup>        |
| 5                                       | 2.23                                        | 7                     | 0                             | 2.23                                                               | 0                                | 0.000               | 0.000                | 0.000                      |
| Group: RHZE/RH-14w Mean 0.396, SD 0.445 |                                             |                       |                               |                                                                    |                                  |                     |                      |                            |
| 1                                       | 2.23                                        | 7                     | 1                             | 1.80                                                               | 0                                | <0.556 <sup>a</sup> | <1.364 <sup>a</sup>  | <0.093 <sup>a</sup>        |
| 2                                       | 2.25                                        | 7                     | 2                             | 1.65                                                               | 0                                | <0.606 <sup>a</sup> | <1.364 <sup>a</sup>  | <0.135 <sup>a</sup>        |
| 3                                       | 2.26                                        | 7                     | 2                             | 1.50                                                               | 6                                | 4.000               | 9.040                | 0.956                      |
| 4                                       | 2.26                                        | 7                     | 1                             | 1.80                                                               | 5                                | 2.778               | 6.278                | 0.798                      |
| 5                                       | 2.24                                        | 7                     | 0                             | 2.24                                                               | 1                                | 0.446               | 1.000                | 0.000                      |

| Group: DCMB-10w |      | Mean 0.038, SD 0.034 |   |      |   |                     |                     |                     |
|-----------------|------|----------------------|---|------|---|---------------------|---------------------|---------------------|
| 1               | 2.22 | 7                    | 1 | 1.92 | 0 | <0.521 <sup>a</sup> | <1.156 <sup>a</sup> | <0.063 <sup>a</sup> |
| 2               | 2.24 | 7                    | 1 | 1.94 | 0 | <0.515 <sup>a</sup> | <1.155 <sup>a</sup> | <0.062 <sup>a</sup> |
| 3               | 2.28 | 7                    | 0 | 2.28 | 0 | 0.000               | 0.000               | 0.000               |
| 4               | 2.23 | 7                    | 0 | 2.23 | 0 | 0.000               | 0.000               | 0.000               |
| 5               | 2.22 | 7                    | 1 | 1.92 | 0 | <0.521 <sup>a</sup> | <1.156 <sup>a</sup> | <0.063 <sup>a</sup> |
| Group: DCMB-12w |      | Mean 0.086, SD 0.099 |   |      |   |                     |                     |                     |
| 1               | 2.22 | 7                    | 2 | 1.62 | 0 | <0.617 <sup>a</sup> | <1.370 <sup>a</sup> | <0.137 <sup>a</sup> |
| 2               | 2.24 | 7                    | 1 | 1.94 | 0 | <0.515 <sup>a</sup> | <1.155 <sup>a</sup> | <0.062 <sup>a</sup> |
| 3               | 2.17 | 7                    | 3 | 1.27 | 0 | <0.787 <sup>a</sup> | <1.709 <sup>a</sup> | <0.233 <sup>a</sup> |
| 4               | 2.30 | 7                    | 0 | 2.30 | 0 | 0.000               | 0.000               | 0.000               |
| 5               | 2.23 | 7                    | 0 | 2.23 | 0 | 0.000               | 0.000               | 0.000               |
| Group: DCMB-14w |      | Mean 0.044, SD 0.098 |   |      |   |                     |                     |                     |
| 1               | 2.24 | 7                    | 0 | 2.24 | 0 | 0.000               | 0.000               | 0.000               |
| 2               | 2.22 | 7                    | 0 | 2.22 | 0 | 0.000               | 0.000               | 0.000               |
| 3               | 2.27 | 7                    | 3 | 1.37 | 0 | <0.730 <sup>a</sup> | <1.657 <sup>a</sup> | <0.219 <sup>a</sup> |
| 4               | 2.25 | 7                    | 0 | 2.25 | 0 | 0.000               | 0.000               | 0.000               |
| 5               | 2.22 | 7                    | 0 | 2.22 | 0 | 0.000               | 0.000               | 0.000               |

<sup>a</sup>In mice with contamination detected in one or more of the plates while the rest of the plates had no MTB colonies, one colony was assigned as the total CFU count of uncontaminated plates to calculate CFU/lung.



## Reference

1. Andries K, Villellas C, Coeck N, Thys K, Gevers T, Vranckx L, Lounis N, de Jong BC, Koul A. 2014. Acquired resistance of *Mycobacterium tuberculosis* to bedaquiline. *PloS One* 9:e102135.
